# Supplementary material for: Adoptive Transfer of MART-1 T-Cell Receptor Transgenic Lymphocytes and Dendritic Cell Vaccination in Patients with Metastatic Melanoma
Source: Oxford University Press journal article supplement (doi:10.1158/1078-0432.ccr-13-3017), 2014-03-14

## Supplementary Figure 6

Comparison of IL-17 production by F5-10 infused TCR transgenic cells stimulated with MART-1-pulsed K562 A2.1 cells with that of patients who did not develop pancytopenia

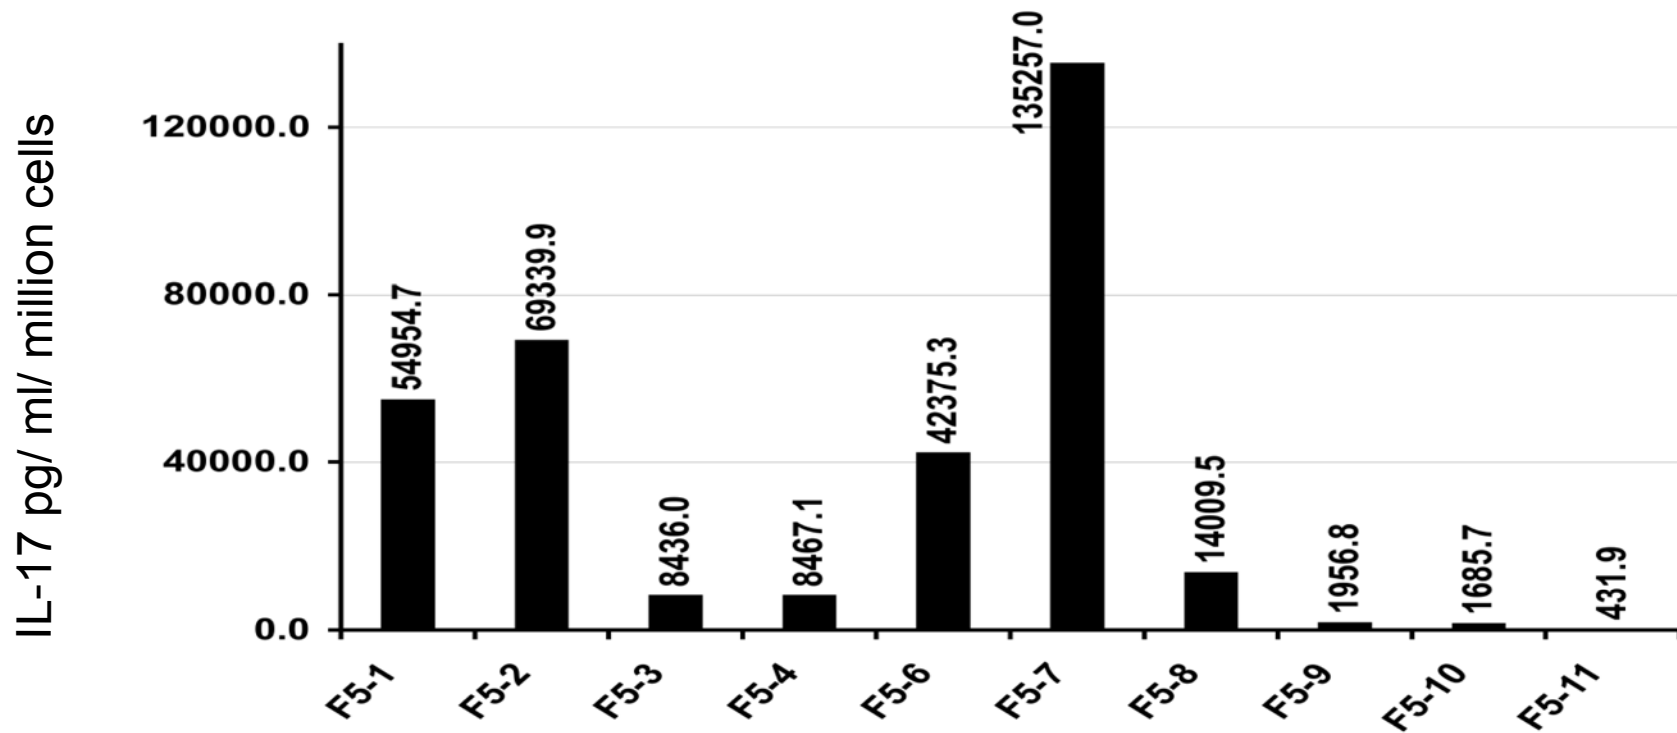

Supplement: 10780432ccr133017-sup-fig6.pdf [file 10780432ccr133017-sup-fig6.pdf]
